# Supplementary material
Source: PubMed Central journal article supplement (PMC6858794)
Supplement: NIHMS1535183-supplement-1.pdf [file NIHMS1535183-supplement-1.pdf]

## **Supplemental Material**

### **Title: Discontinuation of Angiotensin Converting Enzyme Inhibitors and Angiotensin Receptor Blockers in Chronic Kidney Disease**

#### **Authors:**

Yao Qiao, MPH (1, 2); Jung-Im Shin, MD, PhD (1, 2); Yingying Sang, MS (1, 2); Lesley A. Inker, MD, MS (3); Alex Secora, MPH (1, 2); Shengyuan Luo, MBBS, MHS (1, 2); Josef Coresh, MD (1, 2); G. Caleb Alexander, MD, MS (1); John W. Jackson, ScD (1); Alex R. Chang, MD, MS (4); Morgan E. Grams, MD, PhD (1, 2, 5)

#### **Affiliations:**

- (1) Johns Hopkins University Bloomberg School of Public Health, Johns Hopkins University, Baltimore, Maryland
- (2) Welch Center for Prevention, Epidemiology and Clinical Research, Johns Hopkins University, Baltimore, Maryland
- (3) Tufts Medical Center, Department of Internal Medicine, Division of Nephrology, Boston, Massachusetts
- (4) Division of Nephrology, Geisinger Health System, Danville, Pennsylvania
- (5) Johns Hopkins University Department of Internal Medicine, Division of Nephrology, Baltimore, Maryland

#### **Corresponding Author:**

Morgan E. Grams MD, PhD,  
Department of Medicine,  
The Johns Hopkins University,  
2024 E. Monument St., Baltimore, MD 21205  
Email: [mgrams2@jhmi.edu](mailto:mgrams2@jhmi.edu)  
Phone: 443-287-1827

Running title: Discontinuation of ACE-I and ARB in CKD

**The supplemental material contains the following tables and figures:**

- Supplemental Table 1. Drug products included in the analysis
- Supplemental Table 2. International classification of disease, 9th and 10th editions, clinical modification (ICD-9-CM, ICD-10-CM) used to define disease conditions
- Supplemental Table 3. Associations between clinical and demographic factors and restarting ACE-I/ARB within six months of therapy discontinuation
- Supplemental Figure 1. Derivation of study cohort
- Supplemental Figure 2. Time to discontinuation of beta-blockers since therapy initiation, by baseline CKD stage

**Supplemental Table 1. Drug products included in the analysis**

**(a) Angiotensin Converting Enzyme Inhibitors**

---

ACCUPRIL  
ACCURETIC  
ACEON  
ALTACE  
AMLODIPINE BESY-BENAZEPRIL HCL  
BENAZEPRIL HCL  
BENAZEPRIL-HYDROCHLOROTHIAZIDE  
CAPOTEN  
CAPOZIDE  
CAPTOPRIL  
CAPTOPRIL-HYDROCHLOROTHIAZIDE  
ENALAPRIL  
ENALAPRIL MAL-DILTIAZEM MALATE  
ENALAPRIL MALEATE  
ENALAPRIL MALEATE-FELODIPINE  
ENALAPRIL-HYDROCHLOROTHIAZIDE  
FOSINOPRIL SODIUM  
FOSINOPRIL SODIUM-HCTZ  
LEXXEL  
LISINOPRIL & DIET MANAGE PROD  
LISINOPRIL  
LISINOPRIL-HCTZ  
LISINOPRIL-HYDROCHLOROTHIAZIDE  
LOTENSIN  
LOTENSIN HCT  
LOTREL  
MAVIK  
MOEXIPRIL HCL  
MOEXIPRIL-HYDROCHLOROTHIAZIDE  
MONOPRIL  
MONOPRIL HCT  
PERINDOPRIL ERBUMINE  
PRINIVIL  
PRINZIDE  
QUINAPRIL  
QUINAPRIL HCL  
QUINAPRIL-HYDROCHLOROTHIAZIDE  
QUINARETIC  
RAMIPRIL  
TARKA  
TRANDOLAPRIL  
TRANDOLAPRIL-VERAPAMIL HCL  
UNIRETIC  
UNIVASC

---

---

VASERETIC  
VASOTEC  
ZESTORETIC  
ZESTRIL

---

---

**(b) Angiotensin Receptor Blockers**

---

AMLODIPINE BESYLATE-VALSARTAN  
AMLODIPINE-OLMESARTAN  
AMLODIPINE-VALSARTAN-HCTZ  
ATACAND  
ATACAND HCT  
AVALIDE  
AVAPRO  
AZILSARTAN MEDOXOMIL  
AZILSARTAN-CHLORTHALIDONE  
AZOR  
BENICAR  
BENICAR HCT  
CANDESARTAN CILEXETIL  
CANDESARTAN CILEXETIL-HCTZ  
COZAAR  
DIOVAN  
DIOVAN HCT  
EDARBI  
EDARBYCLOR  
ENTRESTO  
EPROSARTAN MESYLATE  
EPROSARTAN MESYLATE-HCTZ  
EXFORGE  
EXFORGE HCT  
HYZAAR  
IRBESARTAN  
IRBESARTAN-HYDROCHLOROTHIAZIDE  
LOSARTAN  
LOSARTAN POTASSIUM  
LOSARTAN POTASSIUM-HCTZ  
MICARDIS  
MICARDIS HCT  
OLMESARTAN MEDOXOMIL  
OLMESARTAN MEDOXOMIL-HCTZ  
OLMESARTAN-AMLODIPINE-HCTZ  
SACUBITRIL-VALSARTAN  
TELMISARTAN  
TELMISARTAN-AMLODIPINE  
TELMISARTAN-HCTZ  
TEVETEN

---

---

TEVETEN HCT  
TRIBENZOR  
TWINSTA  
VALSARTAN  
VALSARTAN-HYDROCHLOROTHIAZIDE  
VALTURNA

---

---

**(c) Beta Blockers**

---

ACEBUTOLOL HCL  
ATENOLOL  
ATENOLOL-CHLORTHALIDONE  
BETAPACE  
BETAPACE AF  
BETAXOLOL HCL  
BISOPROLOL  
BISOPROLOL FUMARATE  
BISOPROLOL FUMARATE-HCTZ  
BISOPROLOL-HYDROCHLOROTHIAZIDE  
BLOCADREN  
BYSTOLIC  
CARVEDILOL & DIET MANAGE PROD  
CARVEDILOL  
CARVEDILOL PHOSPHATE  
COREG  
CORGARD  
CORZIDE  
DUTOPROL  
INDERAL  
INDERIDE  
INNOPRAN  
KERLONE  
LABETALOL  
LABETALOL HCL  
LEVATOL  
LOPRESSOR  
LOPRESSOR HCT  
METOPROLOL & DIET MANAGE PROD  
METOPROLOL  
METOPROLOL SUCCINATE  
METOPROLOL TARTRATE  
METOPROLOL  
METOPROLOL-HCTZ  
METOPROLOL-HYDROCHLOROTHIAZIDE  
NADOLOL  
NADOLOL-BENDROFLUMETHIAZIDE  
NEBIVOLOL HCL

---

---

NORMODYNE  
PINDOLOL  
PROPRANOLOL HCL  
PROPRANOLOL-HCTZ  
SECTRAL  
SORINE  
SOTALOL  
SOTALOL HCL (AF)  
SOTALOL HCL  
TENORETIC  
TENORMIN  
TIMOLIDE  
TIMOLOL MALEATE  
TIMOLOL-HYDROCHLOROTHIAZIDE  
TOPROL  
TRANDATE  
VISKEN  
ZEBETA  
ZIAC

---

---

**(d) Loop diuretics**

---

BUMETANIDE  
BUMEX  
EDECIN  
FUROSEMIDE  
LASIX

---

---

**(e) Thiazide diuretics**

---

ACCURETIC  
ALDORIL  
ALISKIREN-AMLODIPINE-HCTZ  
ALISKIREN-HYDROCHLOROTHIAZIDE  
AMLODIPINE-VALSARTAN-HCTZ  
APRESAZIDE  
ATACAND HCT  
ATENOLOL-CHLORTHALIDONE  
AVALIDE  
AZILSARTAN-CHLORTHALIDONE  
BENAZEPRIL-HYDROCHLOROTHIAZIDE  
BENDROFLUMETHIAZIDE  
BENICAR HCT  
BISOPROLOL FUMARATE-HCTZ  
BISOPROLOL-HYDROCHLOROTHIAZIDE  
CANDESARTAN CILEXETIL-HCTZ  
CAPOZIDE  
CAPTOPRIL-HYDROCHLOROTHIAZIDE

---

---

CHLOROTHIAZIDE  
CLONIDINE-CHLORTHALIDONE  
CLORPRES  
CORZIDE  
DIOVAN HCT  
DIURIL  
DUTOPROL  
EDARBYCLOR  
ENALAPRIL-HYDROCHLOROTHIAZIDE  
ENDURON  
ENDURONYL  
ENDURONYL FORTE  
ESIDRIX  
EXFORGE HCT  
FOSINOPRIL SODIUM-HCTZ  
HYDRALAZINE & RESERPINE & HCTZ  
HYDRALAZINE-HCTZ  
HYDROCHLOROTHIAZIDE  
HYZAAR  
INDAPAMIDE  
INDERIDE  
IRBESARTAN-HYDROCHLOROTHIAZIDE  
LISINOPRIL-HCTZ  
LISINOPRIL-HYDROCHLOROTHIAZIDE  
LOPRESSOR HCT  
LOSARTAN POTASSIUM-HCTZ  
LOTENSIN HCT  
LOZOL  
METHYCLOTHIAZIDE  
METHYLDOPA-HYDROCHLOROTHIAZIDE  
METOLAZONE  
METOPROLOL-HCTZ  
METOPROLOL-HYDROCHLOROTHIAZIDE  
MICARDIS HCT  
MICROZIDE  
MOEXIPRIL-HYDROCHLOROTHIAZIDE  
MONOPRIL HCT  
MYKROX  
NADOLOL-BENDROFLUMETHIAZIDE  
OLMESARTAN MEDOXOMIL-HCTZ  
OLMESARTAN-AMLODIPINE-HCTZ  
PRINZIDE  
PROPRANOLOL-HCTZ  
QUINAPRIL-HYDROCHLOROTHIAZIDE  
QUINARETIC  
RESERPINE-HYDRALAZINE-HCTZ

---

Discontinuation of ACE-I and ARB in CKD

---

SER-AP-ES  
TEKTURNA HCT  
TELMISARTAN-HCTZ  
TENORETIC  
TIMOLIDE  
TRIBENZOR  
UNIRETIC  
VALSARTAN-HYDROCHLOROTHIAZIDE  
VASERETIC  
ZAROXOLYN  
ZESTORETIC  
ZIAC

---



**Supplemental Table 2. International classification of disease, 9th and 10th editions, clinical modification (ICD-9-CM, ICD-10-CM) used to define disease conditions**

| <b>Disease Conditions</b> | <b>ICD-9-CM codes</b>                      | <b>ICD-10-CM codes</b>               |
|---------------------------|--------------------------------------------|--------------------------------------|
| Diabetes                  | 250.x                                      | E10.x, E11.x, E13.x                  |
| Congestive heart failure  | 428.x                                      | I50.x                                |
| Coronary artery disease   | 410.x, 411.0, 411.8x,<br>412, 414.x, 36.1x | I21.x, I22.x, I23.x,<br>I24.x, I25.x |
| Acute kidney injury       | 584.x                                      | N17.x                                |

**Supplemental Table 3. Associations between clinical and demographic factors and restarting ACE-I/ARB within six months of therapy discontinuation<sup>a</sup>**

| <b>Demographic and Clinical Factors</b>        | <b>Odds Ratio (95% CI)</b> |
|------------------------------------------------|----------------------------|
| CKD Stage (referent: G1)                       |                            |
| G2                                             | 1.04 (0.96, 1.12)          |
| G3a                                            | 1.18 (1.07, 1.31)          |
| G3b                                            | 1.11 (0.97, 1.26)          |
| G4 or G5                                       | 0.83 (0.69, 0.99)          |
| Hospitalization (referent: no hospitalization) |                            |
| Non-AKI-related                                | 1.22 (1.09, 1.37)          |
| AKI-related                                    | 1.15 (0.97, 1.36)          |
| Hypotension                                    | 0.80 (0.62, 1.03)          |
| Low bicarbonate level                          | 0.98 (0.83, 1.16)          |
| Progression                                    | 1.09 (0.92, 1.29)          |
| Hyperkalemia                                   | 1.07 (0.96, 1.20)          |
| Age group (referent: 18-44)                    |                            |
| 45-64                                          | 1.20 (1.10, 1.31)          |
| 65+                                            | 1.13 (1.02, 1.25)          |
| Female                                         | 0.92 (0.87, 0.97)          |
| Black race                                     | 1.20 (1.00, 1.44)          |

<sup>a</sup>ACE-I/ARB = angiotensin converting enzyme inhibitors, angiotensin receptor blockers, or their combination; CKD = chronic kidney disease

## **Figures and legends**

### **Supplemental Figure 1. Derivation of study cohort**

Abbreviations: CKD, chronic kidney disease; ACE-I/ARB, angiotensin converting enzyme inhibitors, angiotensin receptor blockers, or their combination; eGFR, estimated glomerular filtration rate

### **Supplemental Figure 2. Time to discontinuation of beta-blockers since therapy initiation, by baseline CKD stage**

Abbreviations: CKD, chronic kidney disease

## Supplemental Figure 1. Derivation of study cohort

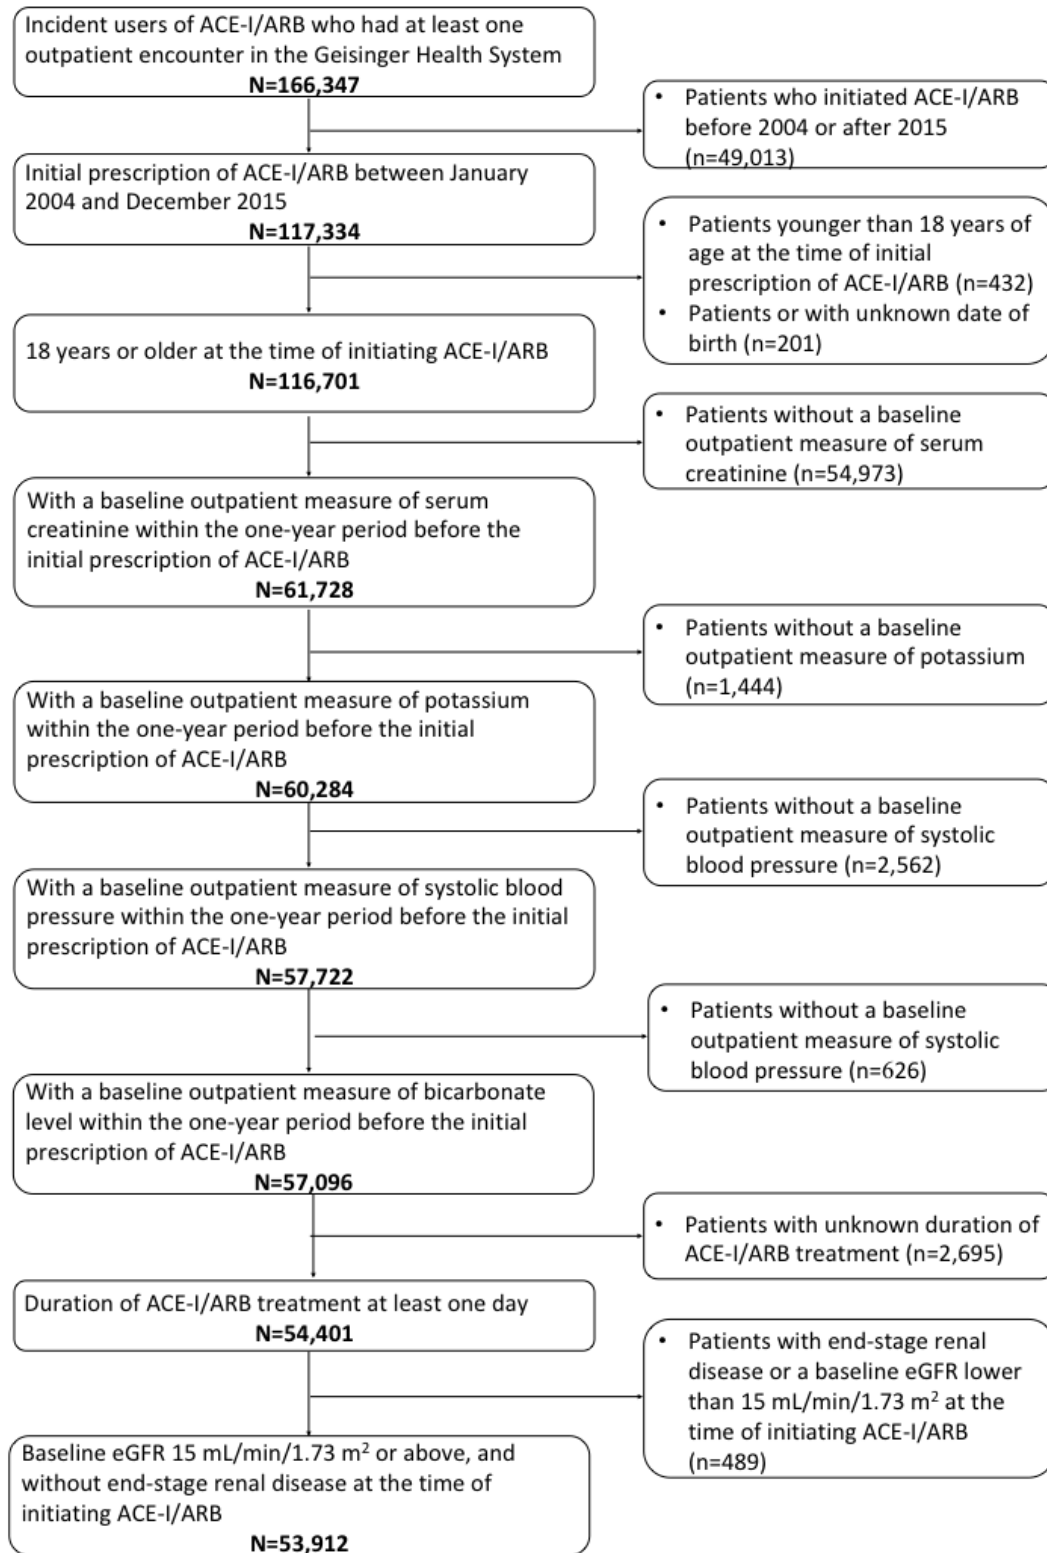

Abbreviations: ACE-I/ARB, angiotensin converting enzyme inhibitors, angiotensin receptor blockers, or their combination; CKD, chronic kidney disease; eGFR, estimated glomerular filtration rate

**Supplemental Figure 2. Time to discontinuation of beta-blockers since therapy initiation, by baseline CKD stage**

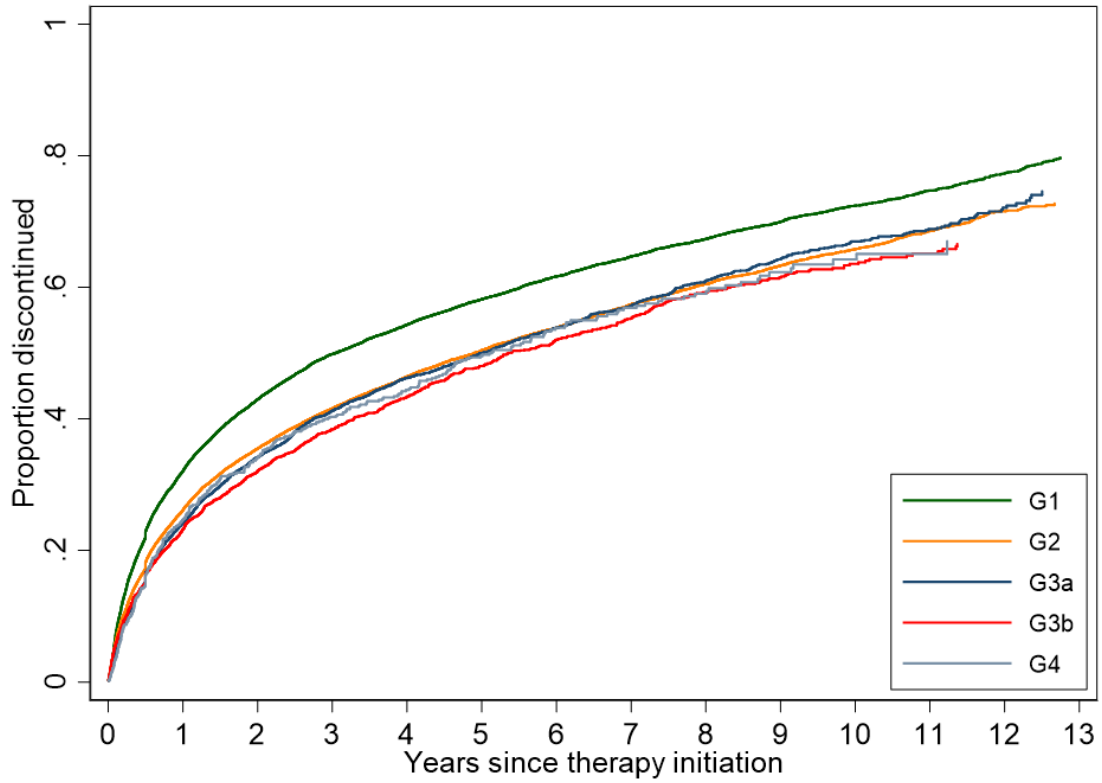

Abbreviations: CKD, chronic kidney disease
